# Supplementary material
Source: PubMed Central journal article supplement (PMC6276053)
Supplement: oc8b00357_si_001.pdf [file oc8b00357_si_001.pdf]

# Using Machine Learning to Predict Suitable Conditions for Organic Reactions

Hanyu Gao, Thomas J. Struble, Connor W. Coley, Yuran Wang, William H. Green,  
Klavs F. Jensen\*

*Department of Chemical Engineering, Massachusetts Institute of Technology; 77  
Massachusetts Avenue, Cambridge, MA 02139*

E-mail: [kfjensen@mit.edu](mailto:kfjensen@mit.edu)

## Supplementary Information

### Computational methods

Neural network models are developed in Keras (Version 2.0.2) and trained using the Theano backend (Version 1.0.0). All trainings are performed on a single NVIDIA GeForce GTX 1080 GPU. The code is developed in Python 2.7.

### Frequency vs rank plots for catalysts, reagents and solvents

Supplementary Figures 1-3 are the frequency vs. rank plots for catalyst, solvent and reagent in Reaxys. It can be seen some duplicated records of the same chemical exists (e.g. palladium diacetate as catalyst and sodium hydroxide as reagent). We kept these as different classes as there is not a good way to systematically identify and curate this issue as it is not clear what is the pattern of these duplicated chemicals with different ids. However, during the training, the model learns that they are very similar entities because one or another of these duplicated chemicals are used in the same type of reactions.

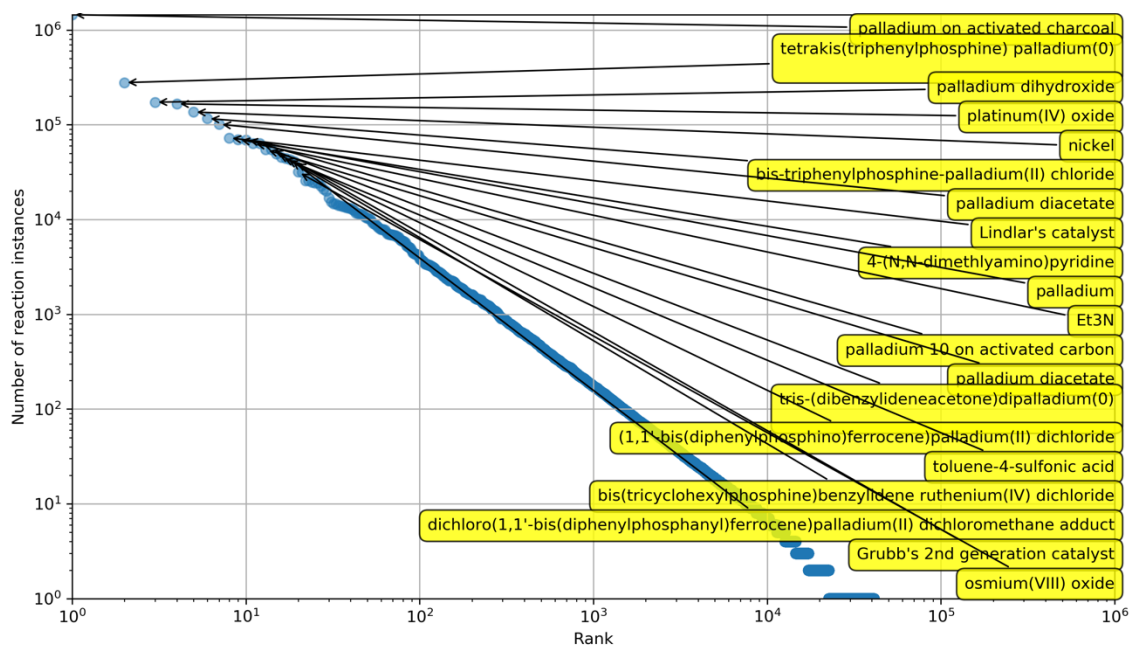

Supplementary Figure 1. Frequency vs. rank plot for catalyst in Reaxys (with the top ones labeled in yellow)

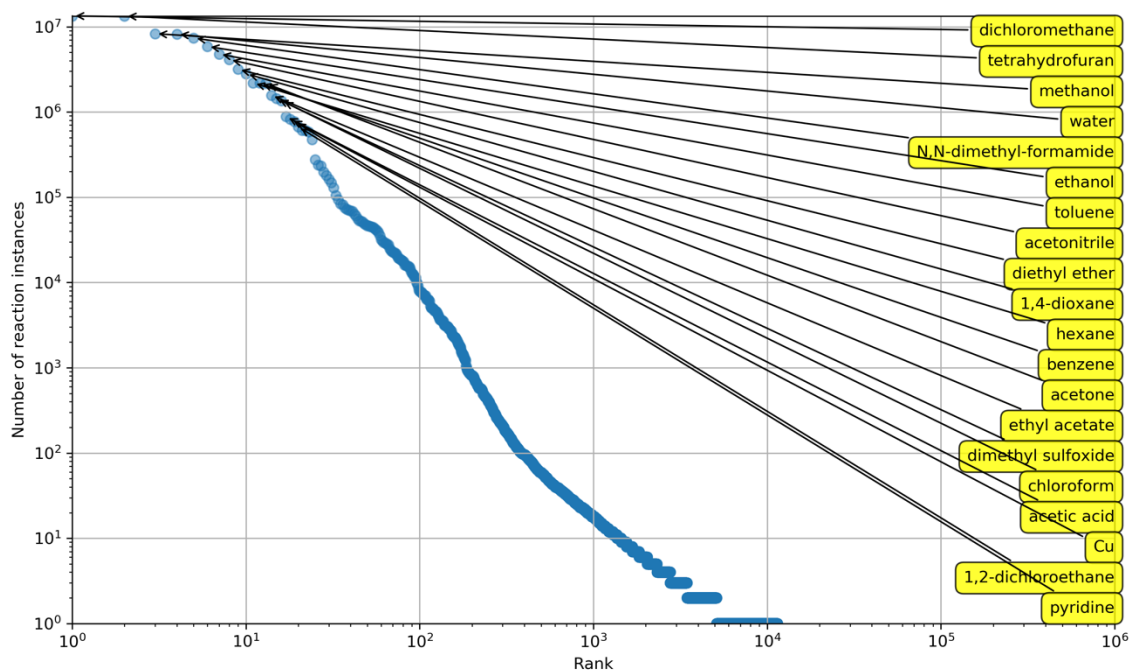

Supplementary Figure 2. Frequency vs. rank plot for solvent in Reaxys (with the top ones labeled in yellow)

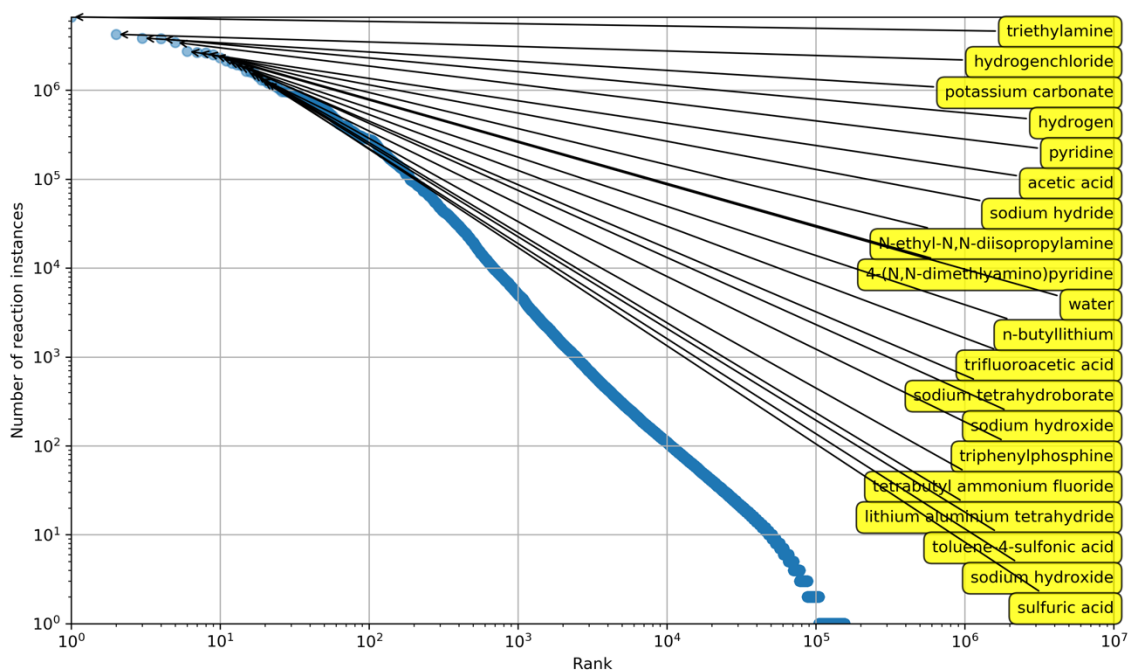

Supplementary Figure 3. Frequency vs. rank plot for reagent in Reaxys (with the top ones labeled in yellow)

### Comparison of prediction accuracies with a null model

A null model is defined to always give the same prediction of top ten combinations chosen based on the frequencies of the catalysts, solvents and reagents. The top 10 combinations of the null model are listed below in Supplementary Table 1.

Supplementary Table 1. The top-ten combinations used in the null model

| Rank | Catalyst                 | Solvent 1        | Solvent 2 | Reagent 1                      | Reagent 2 |
|------|--------------------------|------------------|-----------|--------------------------------|-----------|
| 1    |                          |                  |           |                                |           |
| 2    |                          | DCM <sup>a</sup> |           |                                |           |
| 3    |                          | THF              |           |                                |           |
| 4    |                          |                  |           | TEA                            |           |
| 5    |                          |                  |           | K <sub>2</sub> CO <sub>3</sub> |           |
| 6    |                          | DCM              |           | TEA                            |           |
| 7    |                          | THF              |           | TEA                            |           |
| 8    |                          | DCM              |           | K <sub>2</sub> CO <sub>3</sub> |           |
| 9    |                          | THF              |           | K <sub>2</sub> CO <sub>3</sub> |           |
| 10   | Pd on activated charcoal |                  |           |                                |           |

<sup>a</sup>: DCM: dichloromethane, THF: tetrahydrofuran, TEA: triethylamine

The comparison of prediction accuracies are shown in Supplementary Table 2. The accuracy values shown are for top-three exact matches. In general, it can be seen that the accuracy values are much lower for the null model. The accuracy of c, s2 and r2 predictions for the null model are high, since a majority of reactions do not use a catalyst, a second solvent or a second reagent, but the trained model is still better than the null model by a large margin.

Supplementary Table 2. Comparison of accuracy for the true context to be in the top-3 predictions to a null model

|                   | Trained neural network model | Null model |
|-------------------|------------------------------|------------|
| c                 | 93.6%                        | 87.3%      |
| s1                | 75.8%                        | 49.4%      |
| s2                | 90.1%                        | 85.6%      |
| r1                | 73.2%                        | 22.0%      |
| r2                | 89.3%                        | 82.3%      |
| c, s1, r1         | 57.3%                        | 5.7%       |
| c, s1, s2, r1, r2 | 50.1%                        | 4.7%       |

<sup>a</sup> c, s1, s2, r1, r2 refer to catalyst, solvent 1, solvent 2, reagent 1 and reagent 2, respectively;

For temperature prediction, we analyzed a baseline model that predicts the most frequently used temperature for all reactions. Supplementary Figure 4 shows the distribution of temperature for reactions in the test set. The most frequently used temperature is the room temperature (20 °C) which covers a majority of reaction, and the accuracy of the predicted temperature by the baseline model (which is always 20 °C) being within the  $\pm 10^{\circ}\text{C}$  or  $\pm 20^{\circ}\text{C}$  range of the recorded temperature are 40.0% and 49.4%. In the meantime the distribution spans a wide range. Simply predicting the room temperature (20 °C) will result in a mean absolute error of 35.3 °C, which is significantly larger than prediction given by the trained model and would be misleading for reactions that require high or low temperatures.

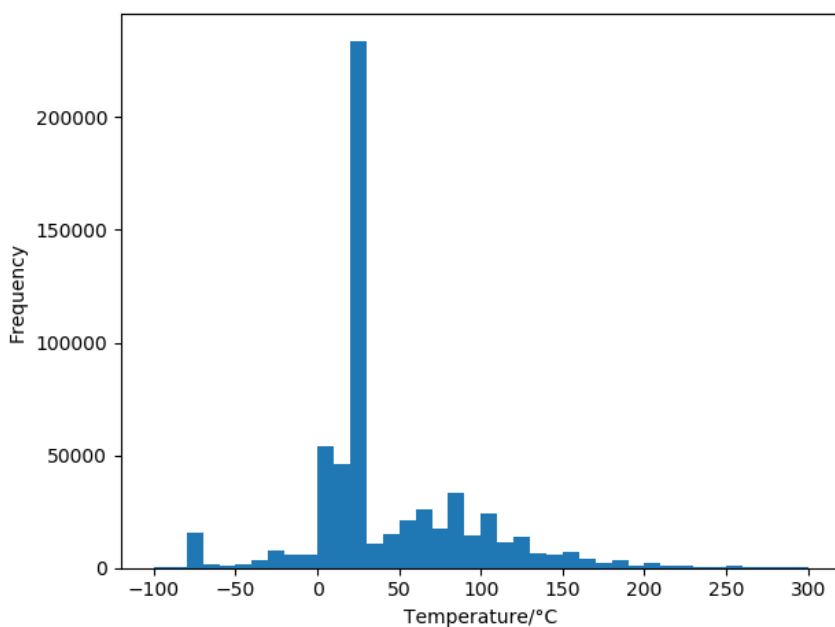

Supplementary Figure 4. Temperature distribution for reactions in the test set

**Full list of evaluation of reaction examples**

**Supplementary Table 3. 62 reactions from eleven reaction types randomly chosen from the test dataset**

| Reaxys ID | Reaction | True Context | Top Prediction | Closest Prediction | True Temperature °C | Top Predicted Temperature °C | Closest Predicted Temperature °C | Reaction Type  |
|-----------|----------|--------------|----------------|--------------------|---------------------|------------------------------|----------------------------------|----------------|
| 5301921   |          |              |                |                    | 20.0                | 19.3                         | 19.3                             | Hydrolysis     |
| 8712792   |          |              |                |                    | N/A                 | 104.4                        | 99.7                             | Hydrolysis     |
| 5261303   |          |              |                |                    | N/A                 | 92.9                         | 88.2                             | Hydrolysis     |
| 8655717   |          |              |                |                    | N/A                 | 30.2                         | 30.2                             | Hydrolysis     |
| 5302180   |          |              |                |                    | 57.5                | 33.1                         | 35.1                             | Hydrolysis     |
| 531162    |          |              |                |                    | 0.0                 | 12.2                         | 9.5                              | Esterification |
| 5185781   |          |              |                |                    | 10.0                | 13.7                         | 11.2                             | Esterification |
| 8698819   |          |              |                |                    | 95.0                | 51.6                         | 59.7                             | Esterification |
| 8669084   |          |              |                |                    | N/A                 | 15.0                         | 15.0                             | Esterification |
| 5336683   |          |              |                |                    | 20.0                | 48.2                         | 48.2                             | Esterification |
| 5220300   |          |              |                |                    | -78.0               | 5.7                          | 13.6                             | Alkylation     |
| 2820838   |          |              |                |                    | 54.5                | 71.6                         | 71.6                             | Alkylation     |
| 8568283   |          |              |                |                    | N/A                 | 18.4                         | 18.4                             | Alkylation     |
| 8738792   |          |              |                |                    | 20.0                | 23.1                         | 47.6                             | Alkylation     |
| 8574982   |          |              |                |                    | 40.0                | 28.2                         | 28.2                             | Alkylation     |
| 8591626   |          |              |                |                    | 10.0                | 15.1                         | 15.1                             | Epoxidation    |
| 8647861   |          |              |                |                    | 0.0                 | 5.4                          | 47.8                             | Epoxidation    |
| 8655813   |          |              |                |                    | 20.0                | 22.5                         | 22.5                             | Epoxidation    |
| 8728054   |          |              |                |                    | 20.0                | 15.2                         | 15.2                             | Epoxidation    |
| 8560887   |          |              |                |                    | 0.0                 | 20.7                         | 20.7                             | Epoxidation    |
| 8598928   |          |              |                |                    | 0.0                 | 12.7                         | 20.9                             | Epoxidation    |
| 5229646   |          |              |                |                    | 0.0                 | 33.8                         | 35.8                             | Epoxidation    |
| 1006987   |          |              |                |                    | 25.0                | 15.2                         | 48.5                             | Epoxidation    |
| 9925682   |          |              |                |                    | N/A                 | 6.0                          | 34.3                             | Epoxidation    |

|          |  |  |  |  |       |       |       |                  |
|----------|--|--|--|--|-------|-------|-------|------------------|
| 4003563  |  |  |  |  | 20.0  | 15.4  | 15.4  | Wittig           |
| 1558712  |  |  |  |  | 110.0 | 44.0  | 44.1  | Wittig           |
| 41951909 |  |  |  |  | 3.0   | 10.7  | 9.5   | Wittig           |
| 9299119  |  |  |  |  | N/A   | 16.6  | 16.6  | Wittig           |
| 28171183 |  |  |  |  | 10.0  | 47.6  | 39.9  | Wittig           |
| 28476112 |  |  |  |  | 20.0  | 33.2  | 33.2  | Wittig           |
| 9240363  |  |  |  |  | 20.0  | 30.3  | 26.4  | Wittig           |
| 2287762  |  |  |  |  | 20.0  | 42.3  | 9.4   | Wittig           |
| 3659689  |  |  |  |  | 20.0  | 21.5  | 18.4  | Deprotection     |
| 3357436  |  |  |  |  | 20.0  | 17.8  | 17.8  | Deprotection     |
| 9304151  |  |  |  |  | N/A   | 16.9  | 16.9  | Deprotection     |
| 9588894  |  |  |  |  | N/A   | 15.9  | 15.9  | Deprotection     |
| 3351204  |  |  |  |  | N/A   | 20.0  | 20.0  | Deprotection     |
| 3297919  |  |  |  |  | N/A   | 8.7   | 8.7   | Reduction        |
| 31266961 |  |  |  |  | 78.0  | 16.2  | 16.2  | Reduction        |
| 3265062  |  |  |  |  | 30.0  | 124.2 | 16.9  | Reduction        |
| 3619786  |  |  |  |  | N/A   | 20.8  | 20.9  | Reduction        |
| 3261651  |  |  |  |  | 20.0  | 75.4  | 75.4  | Reduction        |
| 28315206 |  |  |  |  | 10.0  | 19.5  | 18.2  | Oxidation        |
| 3307293  |  |  |  |  | 25.0  | 3.1   | 3.1   | Oxidation        |
| 9228133  |  |  |  |  | 20.0  | 1.7   | 1.7   | Oxidation        |
| 116049   |  |  |  |  | N/A   | 46.2  | 46.2  | Oxidation        |
| 5081868  |  |  |  |  | 20.0  | 20.6  | 20.6  | Oxidation        |
| 330468   |  |  |  |  | 3.0   | 32.2  | 32.2  | Oxidation        |
| 497226   |  |  |  |  | 80.0  | 176.7 | 130.2 | Blackwald-Harwig |
| 34039114 |  |  |  |  | 95.0  | 42.6  | 70.1  | Blackwald-Harwig |

|          |  |  |  |  |       |       |       |                  |
|----------|--|--|--|--|-------|-------|-------|------------------|
| 1126415  |  |  |  |  | 90.0  | 94.9  | 94.7  | Buchwald-Hartwig |
| 11077029 |  |  |  |  | 100.0 | 120.5 | 120.5 | Buchwald-Hartwig |
| 26046174 |  |  |  |  | 90.0  | 104.3 | 104.3 | Buchwald-Hartwig |
| 33823237 |  |  |  |  | 90.0  | 113.5 | 113.5 | Buchwald-Hartwig |
| 9601192  |  |  |  |  | 19.0  | 31.5  | 39.1  | Krubs            |
| 3603266  |  |  |  |  | 40.0  | 35.6  | 22.6  | Krubs            |
| 25840737 |  |  |  |  | 100.0 | 101.8 | 101.8 | Suzuki           |
| 4033276  |  |  |  |  | 8.0   | 51.5  | 81.1  | Suzuki           |
| 9208506  |  |  |  |  | N/A   | 84.1  | 84.1  | Suzuki           |
| 28883714 |  |  |  |  | N/A   | 95.3  | 95.3  | Suzuki           |
| 10040528 |  |  |  |  | 20.0  | 52.2  | 52.2  | Suzuki           |

Supplementary Table 4. 100 reactions randomly chosen from the test dataset

| Reaxys ID | Reaction | True Context | Top Prediction | Closest Prediction | True Temperature °C | Top Predicted Temperature °C | Closest Predicted Temperature °C |
|-----------|----------|--------------|----------------|--------------------|---------------------|------------------------------|----------------------------------|
| 1383215   |          |              |                |                    | N/A                 | 40.3                         | 32.1                             |
| 10061846  |          |              |                |                    | 60.0                | 29.4                         | 23.8                             |
| 34110175  |          |              |                |                    | -78.0               | -65.6                        | -66.6                            |
| 10261736  |          |              |                |                    | 0.0                 | 15.1                         | 15.1                             |
| 40887505  |          |              |                |                    | 60.0                | 34.3                         | 34.3                             |
| 36028195  |          |              |                |                    | 60.0                | 49.1                         | 49.1                             |
| 2176355   |          |              |                |                    | 0.0                 | -18.7                        | -4.2                             |
| 2069147   |          |              |                |                    | N/A                 | -42.6                        | -13.1                            |
| 1720472   |          |              |                |                    | N/A                 | 34.0                         | 34.0                             |
| 3204380   |          |              |                |                    | N/A                 | 26.2                         | 24.5                             |
| 4822624   |          |              |                |                    | 40.0                | 5.7                          | 5.7                              |
| 34927996  |          |              |                |                    | N/A                 | 34.5                         | 32.1                             |
| 1013620   |          |              |                |                    | N/A                 | 263.4                        | 263.4                            |
| 3928353   |          |              |                |                    | 60.0                | 66.7                         | 66.7                             |
| 26314583  |          |              |                |                    | N/A                 | 25.8                         | 25.8                             |
| 38789242  |          |              |                |                    | 25.0                | 36.3                         | 36.3                             |
| 24852402  |          |              |                |                    | 60.0                | 68.2                         | 68.2                             |
| 3665938   |          |              |                |                    | N/A                 | 28.7                         | 36.7                             |
| 3938431   |          |              |                |                    | 190.0               | 254.5                        | 254.5                            |
| 2215973   |          |              |                |                    | N/A                 | 15.5                         | 47.1                             |
| 4940666   |          |              |                |                    | 100.0               | 85.4                         | 60.6                             |
| 5310995   |          |              |                |                    | N/A                 | 28.7                         | 36.7                             |
| 3938431   |          |              |                |                    | 190.0               | 254.5                        | 254.5                            |
| 2215973   |          |              |                |                    | N/A                 | 15.5                         | 47.1                             |
| 4940666   |          |              |                |                    | 100.0               | 85.4                         | 60.6                             |
| 5310995   |          |              |                |                    | N/A                 | 28.7                         | 36.7                             |
| 3938431   |          |              |                |                    | 190.0               | 254.5                        | 254.5                            |
| 2215973   |          |              |                |                    | N/A                 | 15.5                         | 47.1                             |
| 4940666   |          |              |                |                    | 100.0               | 85.4                         | 60.6                             |
| 5310995   |          |              |                |                    | N/A                 | 28.7                         | 36.7                             |
| 3938431   |          |              |                |                    | 190.0               | 254.5                        | 254.5                            |
| 2215973   |          |              |                |                    | N/A                 | 15.5                         | 47.1                             |
| 4940666   |          |              |                |                    | 100.0               | 85.4                         | 60.6                             |
| 5310995   |          |              |                |                    | N/A                 | 28.7                         | 36.7                             |
| 3938431   |          |              |                |                    | 190.0               | 254.5                        | 254.5                            |
| 2215973   |          |              |                |                    | N/A                 | 15.5                         | 47.1                             |
| 4940666   |          |              |                |                    | 100.0               | 85.4                         | 60.6                             |
| 5310995   |          |              |                |                    | N/A                 | 28.7                         | 36.7                             |
| 3938431   |          |              |                |                    | 190.0               | 254.5                        | 254.5                            |
| 2215973   |          |              |                |                    | N/A                 | 15.5                         | 47.1                             |
| 4940666   |          |              |                |                    | 100.0               | 85.4                         | 60.6                             |
| 5310995   |          |              |                |                    | N/A                 | 28.7                         | 36.7                             |
| 3938431   |          |              |                |                    | 190.0               | 254.5                        | 254.5                            |
| 2215973   |          |              |                |                    | N/A                 | 15.5                         | 47.1                             |
| 4940666   |          |              |                |                    | 100.0               | 85.4                         | 60.6                             |
| 5310995   |          |              |                |                    | N/A                 | 28.7                         | 36.7                             |
| 3938431   |          |              |                |                    | 190.0               | 254.5                        | 254.5                            |
| 2215973   |          |              |                |                    | N/A                 | 15.5                         | 47.1                             |
| 4940666   |          |              |                |                    | 100.0               | 85.4                         | 60.6                             |
| 5310995   |          |              |                |                    | N/A                 | 28.7                         | 36.7                             |
| 3938431   |          |              |                |                    | 190.0               | 254.5                        | 254.5                            |
| 2215973   |          |              |                |                    | N/A                 | 15.5                         | 47.1                             |
| 4940666   |          |              |                |                    | 100.0               | 85.4                         | 60.6                             |
| 5310995   |          |              |                |                    | N/A                 | 28.7                         | 36.7                             |
| 3938431   |          |              |                |                    | 190.0               | 254.5                        | 254.5                            |
| 2215973   |          |              |                |                    | N/A                 | 15.5                         | 47.1                             |
| 4940666   |          |              |                |                    | 100.0               | 85.4                         | 60.6                             |
| 5310995   |          |              |                |                    | N/A                 | 28.7                         | 36.7                             |
| 3938431   |          |              |                |                    | 190.0               | 254.5                        | 254.5                            |
| 2215973   |          |              |                |                    | N/A                 | 15.5                         | 47.1                             |
| 4940666   |          |              |                |                    | 100.0               | 85.4                         | 60.6                             |
| 5310995   |          |              |                |                    | N/A                 | 28.7                         | 36.7                             |
| 3938431   |          |              |                |                    | 190.0               | 254.5                        | 254.5                            |
| 2215973   |          |              |                |                    | N/A                 | 15.5                         | 47.1                             |
| 4940666   |          |              |                |                    | 100.0               | 85.4                         | 60.6                             |
| 5310995   |          |              |                |                    | N/A                 | 28.7                         | 36.7                             |
| 3938431   |          |              |                |                    | 190.0               | 254.5                        | 254.5                            |
| 2215973   |          |              |                |                    | N/A                 | 15.5                         | 47.1                             |
| 4940666   |          |              |                |                    | 100.0               | 85.4                         | 60.6                             |
| 5310995   |          |              |                |                    | N/A                 | 28.7                         | 36.7                             |
| 3938431   |          |              |                |                    | 190.0               | 254.5                        | 254.5                            |
| 2215973   |          |              |                |                    | N/A                 | 15.5                         | 47.1                             |
| 4940666   |          |              |                |                    | 100.0               | 85.4                         | 60.6                             |
| 5310995   |          |              |                |                    | N/A                 | 28.7                         | 36.7                             |
| 3938431   |          |              |                |                    | 190.0               | 254.5                        | 254.5                            |
| 2215973   |          |              |                |                    | N/A                 | 15.5                         | 47.1                             |
| 4940666   |          |              |                |                    | 100.0               | 85.4                         | 60.6                             |
| 5310995   |          |              |                |                    | N/A                 | 28.7                         | 36.7                             |
| 3938431   |          |              |                |                    | 190.0               | 254.5                        | 254.5                            |
| 2215973   |          |              |                |                    | N/A                 | 15.5                         | 47.1                             |
| 4940666   |          |              |                |                    | 100.0               | 85.4                         | 60.6                             |
| 5310995   |          |              |                |                    | N/A                 | 28.7                         | 36.7                             |
| 3938431   |          |              |                |                    | 190.0               | 254.5                        | 254.5                            |
| 2215973   |          |              |                |                    | N/A                 | 15.5                         | 47.1                             |
| 4940666   |          |              |                |                    | 100.0               | 85.4                         | 60.6                             |
| 5310995   |          |              |                |                    | N/A                 | 28.7                         | 36.7                             |
| 3938431   |          |              |                |                    | 190.0               | 254.5                        | 254.5                            |
| 2215973   |          |              |                |                    | N/A                 | 15.5                         | 47.1                             |
| 4940666   |          |              |                |                    | 100.0               | 85.4                         | 60.6                             |
| 5310995   |          |              |                |                    | N/A                 | 28.7                         | 36.7                             |
| 3938431   |          |              |                |                    | 190.0               | 254.5                        | 254.5                            |
| 2215973   |          |              |                |                    | N/A                 | 15.5                         | 47.1                             |
| 4940666   |          |              |                |                    | 100.0               | 85.4                         | 60.6                             |
| 5310995   |          |              |                |                    | N/A                 | 28.7                         | 36.7                             |
| 3938431   |          |              |                |                    | 190.0               | 254.5                        | 254.5                            |
| 2215973   |          |              |                |                    | N/A                 | 15.5                         | 47.1                             |
| 4940666   |          |              |                |                    | 100.0               | 85.4                         | 60.6                             |
| 5310995   |          |              |                |                    | N/A                 | 28.7                         | 36.7                             |
| 3938431   |          |              |                |                    | 190.0               | 254.5                        | 254.5                            |
| 2215973   |          |              |                |                    | N/A                 | 15.5                         | 47.1                             |
| 4940666   |          |              |                |                    | 100.0               | 85.4                         | 60.6                             |
| 5310995   |          |              |                |                    | N/A                 | 28.7                         | 36.7                             |
| 3938431   |          |              |                |                    | 190.0               | 254.5                        | 254.5                            |
| 2215973   |          |              |                |                    | N/A                 | 15.5                         |                                  |

|          |  |  |  |  |       |       |       |
|----------|--|--|--|--|-------|-------|-------|
| 9336462  |  |  |  |  | 20.0  | 32.6  | 33.0  |
| 41425736 |  |  |  |  | 20.0  | 33.5  | 33.5  |
| 38554472 |  |  |  |  | N/A   | 123.1 | 123.1 |
| 9671652  |  |  |  |  | N/A   | 189.9 | 152.5 |
| 27763214 |  |  |  |  | 20.0  | 7.2   | 7.2   |
| 5052676  |  |  |  |  | 0.0   | -7.8  | -7.8  |
| 297394   |  |  |  |  | N/A   | 78.1  | 77.4  |
| 281216   |  |  |  |  | 200.0 | 259.9 | 233.1 |
| 518600   |  |  |  |  | N/A   | 36.4  | 36.4  |
| 24973931 |  |  |  |  | N/A   | 16.9  | 16.9  |
| 2797943  |  |  |  |  | N/A   | 149.4 | 149.4 |
| 1654607  |  |  |  |  | N/A   | 123.7 | 123.7 |
| 8841633  |  |  |  |  | N/A   | -48.9 | 26.0  |
| 23314056 |  |  |  |  | N/A   | 37.4  | 49.0  |
| 6963834  |  |  |  |  | N/A   | -12.7 | -12.7 |
| 9899404  |  |  |  |  | N/A   | 105.5 | 96.6  |
| 5127331  |  |  |  |  | 0.0   | 27.4  | 30.9  |
| 38768506 |  |  |  |  | 70.0  | 45.6  | 34.0  |
| 31407236 |  |  |  |  | 20.0  | 18.9  | 22.8  |
| 1822491  |  |  |  |  | 98.0  | 83.4  | 169.9 |
| 11221387 |  |  |  |  | 20.0  | -2.0  | 12.5  |
| 2383147  |  |  |  |  | 20.0  | 42.3  | 42.3  |
| 4492881  |  |  |  |  | 40.0  | 18.8  | 21.1  |
| 4233762  |  |  |  |  | N/A   | 2.5   | 11.3  |

|          |  |  |  |       |       |       |
|----------|--|--|--|-------|-------|-------|
| 36324962 |  |  |  |       |       |       |
| 1986429  |  |  |  | 0.0   | 30.6  | -1.9  |
| 23851486 |  |  |  | N/A   | 42.9  | 68.6  |
| 5337948  |  |  |  | 100.0 | 23.6  | 23.6  |
| 10509025 |  |  |  | -40.0 | 75.7  | 75.7  |
| 37060180 |  |  |  | 20.0  | 30.9  | 35.3  |
| 5327471  |  |  |  | N/A   | 8.7   | 13.5  |
| 545434   |  |  |  | N/A   | 115.6 | 122.6 |
| 461707   |  |  |  | N/A   | 35.1  | 146.1 |
| 11242864 |  |  |  | N/A   | 29.7  | 29.7  |
| 24960905 |  |  |  | N/A   | 30.0  | 30.0  |
| 30084900 |  |  |  | 20.0  | 16.7  | 16.7  |
| 4504557  |  |  |  | N/A   | 2.8   | 2.8   |
| 30102370 |  |  |  | 110.0 | 95.8  | 95.8  |
| 3816753  |  |  |  | N/A   | 32.7  | 37.5  |
| 3210772  |  |  |  | 0.0   | 11.4  | 11.4  |
| 2176468  |  |  |  | N/A   | 99.7  | 98.1  |
| 5139901  |  |  |  | N/A   | 100.6 | 100.6 |
| 20034611 |  |  |  | 20.0  | 22.4  | 22.4  |
| 1387456  |  |  |  | N/A   | 62.1  | 62.1  |
| 10149615 |  |  |  | 20.0  | 21.0  | 13.9  |
| 20237461 |  |  |  | 20.0  | 15.6  | 15.6  |
| 22880776 |  |  |  | 20.0  | 14.6  | 14.6  |
| 32792568 |  |  |  | -30.0 | 52.5  | 16.2  |



|          |                                                                                  |                                                                                   |                                                                                    |                                                                                     |       |       |       |
|----------|----------------------------------------------------------------------------------|-----------------------------------------------------------------------------------|------------------------------------------------------------------------------------|-------------------------------------------------------------------------------------|-------|-------|-------|
| 9905540  | 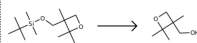   | 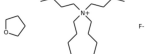   | 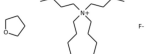   | 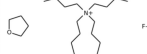   | 20.0  | 17.1  | 17.1  |
| 28176521 | 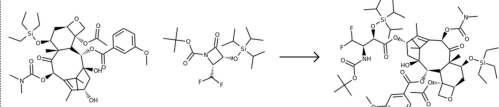 | 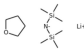 | 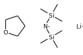 | 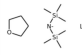 | -40.0 | -25.5 | -25.5 |

Supplementary Table 5. 40 reactions from eleven reaction types randomly chosen from the test dataset that has the least number of correctly or similarly predicted elements

| Reaxys ID | Reaction | True Context | Top Prediction                                 | Closest Prediction                             | True Temperature/°C | Top Predicted Temperature/°C | Closest Predicted Temperature/°C | Reaction type                       |
|-----------|----------|--------------|------------------------------------------------|------------------------------------------------|---------------------|------------------------------|----------------------------------|-------------------------------------|
| 8542028   |          |              | <br>Reaxys Name Lindlar's catalyst             | <br>Reaxys Name 1-octene-1-ol                  | 5.0                 | 20.0                         | 29.1                             | Reduction, Hydrolysis               |
| 5342174   |          |              | BH4- Na+<br>Reaxys Name osone                  | BH4- Na+<br>Reaxys Name osone                  | 20.0                | -65.7                        | -65.7                            | Hydrolysis                          |
| 5240460   |          |              | H2O<br>Reaxys Name osone                       | H2O<br>Reaxys Name osone                       | N/A                 | 48.4                         | 48.4                             | Hydrolysis                          |
| 858489    |          |              | Cl-CH2-Cl<br>Reaxys Name osone                 | Cl-CH2-Cl<br>Reaxys Name osone                 | -39.0               | 14.4                         | 14.4                             | Condensation, Hydrolysis, Oxidation |
| 8651198   |          |              | -OH HCl                                        | -OH HCl                                        | N/A                 | 25.5                         | 27.1                             | Hydrolysis                          |
| 10069687  |          |              |                                                | Reaxys Name bis(acetyllactonate)oxovanadium    | 25.0                | 15.2                         | -48.5                            | Epoxidation                         |
| 9925682   |          |              | Cl-CH2-Cl<br>Reaxys Name osone                 | Cl-CH2-Cl<br>Reaxys Name osone                 | N/A                 | 6.0                          | 14.3                             | Sharpless epoxidation               |
| 29729359  |          |              | Cl-CH2-Cl<br>Reaxys Name osone                 | Cl-CH2-Cl<br>Reaxys Name osone                 | 10.0                | 25.7                         | 30.8                             | Friedel-Crafts alkylation           |
| 8529950   |          |              | Reaxys Name copper(I) chloride                 | Reaxys Name copper(I) chloride                 | 20.0                | 52.8                         | 7.6                              | Alylation, allylation, Bromination  |
| 8526713   |          |              | Reaxys Name lithium hydride                    | Reaxys Name lithium hydride                    | 78.0                | -14.9                        | -14.9                            | deprotonation, Addition, Alkylation |
| 8592120   |          |              | HCl                                            | HCl                                            | 90.0                | 28.3                         | 28.3                             | alkylation                          |
| 8629688   |          |              | Reaxys Name sodium hydride                     | Reaxys Name sodium hydride                     | 20.0                | 13.4                         | 24.6                             | Alkylation                          |
| 34446929  |          |              | Reaxys Name sodium hydride                     | Reaxys Name sodium hydride                     | 20.0                | -9.7                         | 26.5                             | 12.31-Wittig Rearrangement          |
| 33420713  |          |              | Reaxys Name osone                              | Reaxys Name osone                              | 78.0                | 58.5                         | 70.5                             | Wittig reaction                     |
| 28838907  |          |              | Reaxys Name silica gel                         | Reaxys Name silica gel                         | 20.0                | 21.2                         | 8.3                              | Wittig reaction                     |
| 29349499  |          |              | Reaxys Name lithium chloride                   | Reaxys Name lithium chloride                   | 20.0                | 7.4                          | 7.4                              | Wittig Horner reaction              |
| 15903977  |          |              | Reaxys Name sodium hydride                     | Reaxys Name sodium hydride                     | 20.0                | 17.6                         | 17.6                             | Wittig Oxidation                    |
| 5246589   |          |              | Reaxys Name silica gel                         | Reaxys Name silica gel                         | N/A                 | 46.2                         | 40.0                             | deprotection                        |
| 8780005   |          |              | Reaxys Name mercury dichloride                 | Reaxys Name mercury dichloride                 | 22.0                | 32.3                         | 38.4                             | deprotection                        |
| 8585244   |          |              | Reaxys Name palladium 10 on activated carbon   | Reaxys Name palladium 10 on activated carbon   | 20.0                | 24.8                         | 24.8                             | Reduction                           |
| 8692625   |          |              | Reaxys Name palladium 10 on activated charcoal | Reaxys Name palladium 10 on activated charcoal | 100.0               | 37.6                         | 42.0                             | Formylation, reduction              |
| 29313449  |          |              | LH                                             | LH                                             | -60.0               | -3.6                         | -60.5                            | Block reduction                     |
| 42522603  |          |              | NH3                                            | NH3                                            | -63.0               | -68.8                        | -58.8                            | Block reduction                     |
| 8646519   |          |              | Reaxys Name lithium hydride                    | Reaxys Name lithium hydride                    | 20.0                | 25.3                         | 25.3                             | Reduction                           |

|          |  |  |  |  |       |       |       |                                        |
|----------|--|--|--|--|-------|-------|-------|----------------------------------------|
| 1025318  |  |  |  |  | 25.0  | 19.0  | 31.9  | Tamao oxidation                        |
| 5351285  |  |  |  |  | 35.0  | 17.0  | 17.0  | Oxidation                              |
| 8520314  |  |  |  |  | 20.0  | 20.5  | 20.5  | Substitution, Oxidation                |
| 9273620  |  |  |  |  | 20.0  | 4.6   | 4.6   | Bayer-Villiger oxidation               |
| 8627506  |  |  |  |  | 80.0  | 89.1  | 44.4  | Oxidation                              |
| 26007660 |  |  |  |  | 60.0  | 95.2  | 95.2  | Suzuki coupling                        |
| 10342169 |  |  |  |  | 100.0 | 92.5  | 90.7  | Suzuki-Miyaura cross-coupling          |
| 42866700 |  |  |  |  | 80.0  | 102.9 | 97.7  | Suzuki coupling                        |
| 2922485  |  |  |  |  | 80.0  | 80.3  | 88.1  | Suzuki-Miyaura cross-coupling reaction |
| 9645984  |  |  |  |  | 130.0 | 90.2  | 78.5  | Suzuki reaction                        |
| 11152198 |  |  |  |  | 110.0 | 134.9 | 111.2 | Buchwald amidation                     |
| 23567330 |  |  |  |  | 100.0 | 73.7  | 100.1 | Buchwald-Hartwig coupling              |
| 9292801  |  |  |  |  | 100.0 | 126.4 | 95.9  | Buchwald-Hartwig coupling              |
| 25897520 |  |  |  |  | 90.0  | 92.9  | 92.9  | Buchwald reaction                      |
| 25936114 |  |  |  |  | 80.0  | 87.1  | 87.1  | Buchwald-Hartwig reaction              |
| 36087581 |  |  |  |  | N/A   | -3.3  | 14.7  | Grubbs Olefin Metathesis               |

## Comparison with the neighbor approach

The nearest-neighbor method searches the training set for the reaction with the maximum similarity to the reaction for prediction. Cosine similarity of the reaction fingerprint<sup>1</sup> is used to quantify reaction similarity. A thorough search is performed for the 62 reactions in Supplementary Table 3. The top-ten most similar reactions are retrieved, and the top-one prediction and the prediction within top-ten that has the maximum elements matching the true condition are listed in Supplementary Table 6. Good suggestions are found for a majority of the cases, and the overall accuracy for these 62 reactions is comparable to the neural network model. However, the search for one reaction takes ~40 minutes on a single intel® Xeon(R) CPU E5-2690 0 @2.90GHz, as compared to ~100ms for the neural network approach running on the same machine, which is over 10,000 times faster. Further, the nearest neighbor method proposes conditions by simply copy and paste, which does not have the ability to infer missing information.

Supplementary Table 6. Nearest neighbor predictions for the 62 reaction examples in Supplementary Table 3

| Reaxys ID | Reaction | True Context                                                            | Top Prediction                                                                         | Closest Prediction                                                                                  | True Temperature °C | Top Predicted Temperature °C | Closest Predicted Temperature °C |
|-----------|----------|-------------------------------------------------------------------------|----------------------------------------------------------------------------------------|-----------------------------------------------------------------------------------------------------|---------------------|------------------------------|----------------------------------|
| 5301921   |          | <chem>—OH</chem> <chem>—O—</chem> <chem>Na+</chem>                      | <chem>—OH</chem> <chem>Cl—CH2—Cl</chem> <chem>—O—</chem> <chem>Na+</chem>              | <chem>—OH</chem> <chem>—O—</chem> <chem>Na+</chem>                                                  | 20.0                | 20.0                         | 12.0                             |
| 8712792   |          | <chem>CH3OH</chem> <chem>K+</chem> <chem>HO-</chem>                     | <chem>Cl—C(=O)—Cl</chem> <chem>K+</chem>                                               | <chem>CH3OH</chem> <chem>K+</chem> <chem>HO-</chem>                                                 | N/A                 | N/A                          | 80.0                             |
| 5261303   |          | <chem>CH3OH</chem> <chem>H2N—NH2</chem> <chem>H2O</chem>                | <chem>CH3OH</chem> <chem>CH3CH2CH2CH2NH2</chem>                                        | <chem>CH3OH</chem> <chem>CH3CH2CH2CH2NH2</chem>                                                     | N/A                 | N/A                          | N/A                              |
| 8655717   |          | <chem>C1CCOC1</chem> <chem>—OH</chem> <chem>Na+</chem> <chem>HO-</chem> | <chem>C1CCOC1</chem> <chem>Li+</chem> <chem>HO-</chem>                                 | <chem>C1CCOC1</chem> <chem>—OH</chem> <chem>H2O</chem><br>Reaxys Name lithium hydroxide monohydrate | N/A                 | 20.0                         | 20.0                             |
| 5302180   |          | <chem>CH3OH</chem> <chem>Cl—C(=O)—OH</chem> <chem>c1ccccc1</chem>       | <chem>—OH</chem> <chem>Cl—C(=O)—OH</chem> <chem>c1ccccc1</chem>                        | <chem>—OH</chem> <chem>Cl—C(=O)—OH</chem> <chem>c1ccccc1</chem>                                     | 57.5                | N/A                          | N/A                              |
| 53162     |          | <chem>CH3CH2OCH2CH3</chem>                                              | <chem>Cl—CH2—Cl</chem>                                                                 | <chem>Cl—CH2—Cl</chem>                                                                              | 0.0                 | 0.0                          | 0.0                              |
| 5185761   |          | <chem>Cl—CH2—Cl</chem> <chem>c1ccc(C)cc1</chem> <chem>C1CCN1</chem>     | <chem>Cl—C(=O)—Cl</chem>                                                               | <chem>Cl—C(=O)—Cl</chem>                                                                            | 10.0                | N/A                          | N/A                              |
| 3608819   |          | <chem>CH3CH2OCH2CH3</chem>                                              | <chem>HO—SO3H</chem>                                                                   | <chem>CH3CH2OCH2CH3</chem>                                                                          | 95.0                | N/A                          | N/A                              |
| 8660884   |          | <chem>CH3CH2OCH2CH3</chem>                                              | <chem>C1CCN1</chem>                                                                    | <chem>C1CCN1</chem>                                                                                 | N/A                 | N/A                          | N/A                              |
| 5336683   |          | <chem>CH3CH2OCH2CH3</chem>                                              | <chem>CH3CH2OCH2CH3</chem>                                                             | <chem>CH3CH2OCH2CH3</chem>                                                                          | 20.0                | 80.0                         | 80.0                             |
| 5220300   |          | <chem>C1CCN1</chem>                                                     | <chem>C1CCN1</chem>                                                                    | <chem>C1CCN1</chem>                                                                                 | 78.0                | 78.0                         | 78.0                             |
| 2820838   |          | <chem>HO—SO3H</chem>                                                    | <chem>HO—SO3H</chem>                                                                   | <chem>HO—SO3H</chem>                                                                                | 54.5                | 95.0                         | 95.0                             |
| 8508283   |          | <chem>CH3CH2OCH2CH3</chem>                                              | <chem>CH3CH2OCH2CH3</chem>                                                             | <chem>CH3CH2OCH2CH3</chem>                                                                          | N/A                 | 0.0                          | 0.0                              |
| 8738792   |          | <chem>CH3CH2OCH2CH3</chem>                                              | <chem>CH3CH2OCH2CH3</chem>                                                             | <chem>CH3CH2OCH2CH3</chem>                                                                          | 20.0                | 35.0                         | 35.0                             |
| 8574982   |          | <chem>CH3CH2OCH2CH3</chem>                                              | <chem>CH3CH2OCH2CH3</chem>                                                             | <chem>CH3CH2OCH2CH3</chem>                                                                          | 40.0                | 40.0                         | 40.0                             |
| 8591626   |          | <chem>—OH</chem> <chem>Na+</chem> <chem>HO-</chem> <chem>HO—OH</chem>   | <chem>—OH</chem> <chem>H2O</chem> <chem>Na+</chem> <chem>HO-</chem> <chem>HO—OH</chem> | <chem>—OH</chem> <chem>H2O</chem> <chem>Na+</chem> <chem>HO-</chem> <chem>HO—OH</chem>              | 10.0                | 0.0                          | 0.0                              |
| 8647861   |          | <chem>C1CCN1</chem>                                                     | <chem>C1CCN1</chem>                                                                    | <chem>C1CCN1</chem>                                                                                 | 0.0                 | 0.0                          | 0.0                              |
| 8655813   |          | <chem>—OH</chem> <chem>NH3</chem>                                       | <chem>—OH</chem> <chem>—O—</chem> <chem>Na+</chem>                                     | <chem>—OH</chem> <chem>NH3</chem>                                                                   | 20.0                | N/A                          | 20.0                             |
| 8720054   |          | <chem>Cl—CH2—Cl</chem>                                                  | <chem>Cl—CH2—Cl</chem>                                                                 | <chem>Cl—CH2—Cl</chem>                                                                              | 20.0                | 20.0                         | 20.0                             |
| 8508087   |          | <chem>C1CCN1</chem>                                                     | <chem>C1CCN1</chem>                                                                    | <chem>C1CCN1</chem>                                                                                 | 0.0                 | N/A                          | 0.0                              |
| 8598928   |          | <chem>Cl—CH2—Cl</chem>                                                  | <chem>Cl—CH2—Cl</chem>                                                                 | <chem>Cl—CH2—Cl</chem>                                                                              | 0.0                 | N/A                          | N/A                              |
| 5229646   |          | <chem>Cl—CH2—Cl</chem>                                                  | <chem>Cl—CH2—Cl</chem>                                                                 | <chem>Cl—CH2—Cl</chem>                                                                              | 0.0                 | 110.0                        | N/A                              |
| 10069887  |          | <chem>CH3CH2OCH2CH3</chem>                                              | <chem>CH3CH2OCH2CH3</chem>                                                             | <chem>CH3CH2OCH2CH3</chem>                                                                          | 25.0                | 10.0                         | N/A                              |

|          |  |                                             |                                                          |                                                          |       |       |       |
|----------|--|---------------------------------------------|----------------------------------------------------------|----------------------------------------------------------|-------|-------|-------|
| 9925682  |  | <br>Ni(acetylacetonate)iron(II) Reaxys Name | <br>Reaxys Name bis(acetylacetonate)iron(II) Reaxys Name | <br>Reaxys Name bis(acetylacetonate)iron(II) Reaxys Name | N/A   | N/A   | N/A   |
| 40053563 |  |                                             |                                                          |                                                          | 20.0  | 20.0  | 20.0  |
| 1558712  |  |                                             |                                                          |                                                          | 110.0 | 80.0  | 110.0 |
| 41951969 |  |                                             |                                                          |                                                          | 9.0   | 20.0  | 20.0  |
| 9299119  |  |                                             |                                                          |                                                          | N/A   | N/A   | 15.0  |
| 28171183 |  |                                             |                                                          |                                                          | 10.0  | 10.0  | 10.0  |
| 28476112 |  |                                             |                                                          |                                                          | 20.0  | 20.0  | 20.0  |
| 9240363  |  |                                             |                                                          |                                                          | 20.0  | 20.0  | 20.0  |
| 2287782  |  |                                             |                                                          |                                                          | 20.0  | N/A   | 20.0  |
| 3639689  |  |                                             |                                                          |                                                          | 20.0  | N/A   | 20.0  |
| 5357436  |  |                                             |                                                          |                                                          | 20.0  | 20.0  | 20.0  |
| 5304351  |  |                                             |                                                          |                                                          | N/A   | N/A   | N/A   |
| 8588894  |  |                                             |                                                          |                                                          | N/A   | 20.0  | 20.0  |
| 5331204  |  |                                             |                                                          |                                                          | N/A   | N/A   | N/A   |
| 5297919  |  |                                             |                                                          |                                                          | N/A   | N/A   | N/A   |
| 3126961  |  |                                             |                                                          |                                                          | 78.0  | 78.0  | 78.0  |
| 5255902  |  |                                             |                                                          |                                                          | 30.0  | 150.0 | 25.0  |
| 8619786  |  |                                             |                                                          |                                                          | N/A   | 35.0  | N/A   |
| 5261651  |  |                                             |                                                          |                                                          | 20.0  | 5.0   | 5.0   |
| 28315200 |  |                                             |                                                          |                                                          | 10.0  | N/A   | 20.0  |
| 5307293  |  |                                             |                                                          |                                                          | 25.0  | N/A   | N/A   |
| 9228133  |  |                                             |                                                          |                                                          | 20.0  | 20.0  | 20.0  |
| 116049   |  |                                             |                                                          |                                                          | N/A   | 20.0  | 12.5  |

|          |  |  |  |       |       |       |
|----------|--|--|--|-------|-------|-------|
| 5081868  |  |  |  | 20.0  | 0.0   | 0.0   |
| 334468   |  |  |  | 0.0   | N/A   | N/A   |
| 4977260  |  |  |  | 80.0  | N/A   | 90.0  |
| 34039114 |  |  |  | 95.0  | 105.0 | 105.0 |
| 11260415 |  |  |  | 90.0  | 100.0 | 95.0  |
| 11077029 |  |  |  | 120.0 | 120.0 | 120.0 |
| 26046174 |  |  |  | 90.0  | 90.0  | 90.0  |
| 33823237 |  |  |  | 80.0  | 80.0  | 80.0  |
| 9603192  |  |  |  | 19.0  | 19.0  | 19.0  |
| 36052206 |  |  |  | 80.0  | 80.0  | 80.0  |
| 25440737 |  |  |  | 100.0 | 100.0 | 100.0 |
| 4033276  |  |  |  | 8.0   | 120.0 | 120.0 |
| 9208506  |  |  |  | N/A   | N/A   | N/A   |
| 28885714 |  |  |  | N/A   | N/A   | N/A   |
| 10040528 |  |  |  | 20.0  | 20.0  | 20.0  |

## Evaluation of the Michael additions used by Marcou et al.<sup>2</sup>

Among the 52 reactions, 34 of them are found in the final dataset, and we have detailed information about these reactions for evaluation. The model is retrained with these reactions excluded from the training set. The top-ten accuracy of these 34 reactions for similar matches is 47.0%, and the accuracy for similarly matching catalyst, solvent 1 and reagent 1 is 55.9%, lower than the overall accuracy of the entire dataset, yet a significant improvement over literature results.<sup>2</sup> Furthermore, it has been pointed out that many of these reactions can occur under different conditions, meaning some predictions are not necessarily wrong, even when they differ from the recorded context. For example, Supplementary Figure 5 shows reactions where the exact recorded condition is not predicted. The first example has a different solvent predicted, but it is similar to the recorded solvent (both are alcohols).<sup>3</sup> For the second example, although the model does not suggest the correct solvent and reagent in the first choice, it recognizes the need for basic conditions in the subsequent suggestions, with the second suggestion being piperidine and the third being triethylamine.<sup>4</sup> Supplementary Figure 5(C) is another example of data quality that complicates the analysis. Two reagents  $\text{NaHCO}_3$  and  $\text{HCl}$  are not commonly used in the same reactions but in separate steps which is the case in the reported procedure.<sup>5</sup> Additionally, the true solvent used for the reaction is ethanol where diethyl ether is used as an extraction solvent in workup. The full prediction results are presented in Supplementary Table 7.

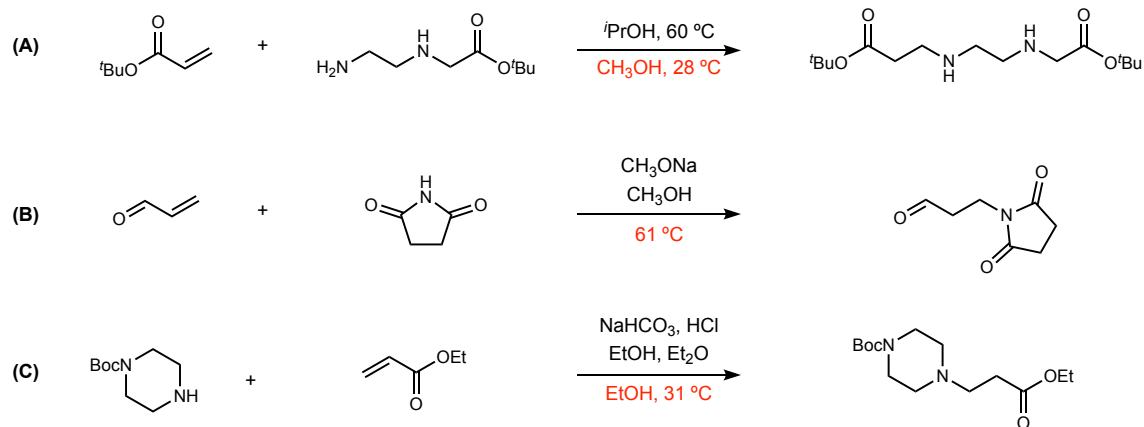

Supplementary Figure 5. Examples of Michael additions where none of the recorded c, s1 or r1 are predicted. A) Methanol is predicted, which is similar to the recorded solvent (isopropanol); B) the top prediction is incorrect, but subsequent predictions suggest bases as reagents (the second suggestion is piperidine and the third is triethylamine); C) the reaction has incompatible reagents that are used in different stages but not reflected in the reaction record.

Supplementary Table 7. 34 examples of Michael additions that are used for evaluation in the work of Marcou et al.

| Reaxys ID | Reaction | True Context | Top Prediction                   | Closest Prediction | True Temperature/°C | Top Predicted Temperature/°C | Closest Predicted Temperature/°C |
|-----------|----------|--------------|----------------------------------|--------------------|---------------------|------------------------------|----------------------------------|
| 1493719   |          |              |                                  |                    | 20.0                | 23.7                         | 23.7                             |
| 405835    |          |              |                                  |                    | N/A                 | 34.6                         | 32.9                             |
| 1288921   |          |              |                                  |                    | 20.0                | 29.9                         | 29.9                             |
| 24352854  |          |              | <br>Reaxys Name potassium iodide |                    | N/A                 | 67.4                         | 57.3                             |
| 8861928   |          |              |                                  |                    | N/A                 | 18.6                         | 29.6                             |
| 23748241  |          |              |                                  |                    | 10.0                | 26.3                         | 26.3                             |
| 25669226  |          |              |                                  |                    | N/A                 | 57.2                         | 57.2                             |
| 21227051  |          |              |                                  |                    | N/A                 | 30.7                         | 30.7                             |
| 24275953  |          |              |                                  |                    | N/A                 | 36.3                         | 36.3                             |
| 24717084  |          |              |                                  |                    | N/A                 | 34.9                         | 34.9                             |
| 24971546  |          |              |                                  |                    | N/A                 | 46.9                         | 50.0                             |
| 694909    |          |              |                                  |                    | 30.0                | 35.6                         | 26.5                             |
| 46547     |          |              |                                  |                    | N/A                 | 60.8                         | 60.8                             |
| 1456140   |          |              |                                  |                    | 20.0                | 37.4                         | 37.4                             |
| 24879120  |          |              |                                  |                    | N/A                 | 79.5                         | 79.5                             |
| 2924844   |          |              |                                  |                    | 0.0                 | 51.9                         | 16.7                             |
| 22879782  |          |              |                                  |                    | N/A                 | 43.4                         | 48.4                             |
| 24889073  |          |              |                                  |                    | N/A                 | 43.7                         | 43.7                             |
| 1284594   |          |              |                                  |                    | 20.0                | 14.3                         | 14.3                             |
| 24576080  |          |              |                                  |                    | N/A                 | -3.6                         | -3.6                             |
| 3363418   |          |              |                                  |                    | N/A                 | 61.1                         | 29.8                             |
| 24576100  |          |              |                                  |                    | N/A                 | 73.3                         | 73.3                             |
| 701198    |          |              |                                  |                    | 20.0                | 47.0                         | 27.6                             |
| 24581394  |          |              |                                  |                    | N/A                 | 19.6                         | 36.2                             |
| 649317    |          |              |                                  |                    | 20.0                | 25.9                         | 25.9                             |
| 4051      |          |              |                                  |                    | 20.0                | 28.6                         | 28.6                             |
| 1297143   |          |              |                                  |                    | 10.0                | 24.0                         | 24.0                             |

|          |                                                                                  |                                                                                                                                                                                        |                                                                                     |                                                                                     |      |      |      |
|----------|----------------------------------------------------------------------------------|----------------------------------------------------------------------------------------------------------------------------------------------------------------------------------------|-------------------------------------------------------------------------------------|-------------------------------------------------------------------------------------|------|------|------|
| 4046     | 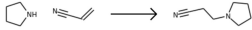   |                                                                                                                                                                                        |                                                                                     |                                                                                     | 90.0 | 33.8 | 33.8 |
| 35987442 | 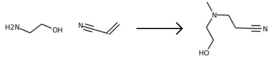  |                                                                                                                                                                                        |                                                                                     |                                                                                     | 50.0 | 57.8 | 57.8 |
| 24722182 | 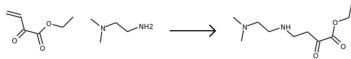 | 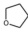                                                                                                      | 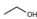 | 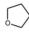 | N/A  | 32.4 | 26.5 |
| 24503535 | 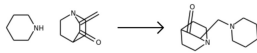 | 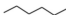                                                                                                      | H <sub>2</sub> O                                                                    | H <sub>2</sub> O                                                                    | N/A  | 62.4 | 62.4 |
| 21567748 | 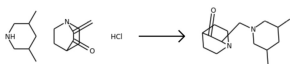 | H <sub>2</sub> O 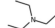 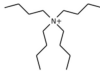 | Br <sup>-</sup> —OH                                                                 | H <sub>2</sub> O Na <sup>+</sup> HO <sup>-</sup>                                    | 80.0 | 38.3 | 41.3 |
| 24960665 | 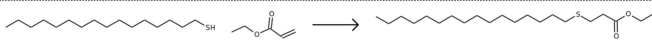 | 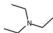                                                                                                      |                                                                                     | 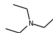 | N/A  | 66.9 | 44.4 |
| 23665071 | 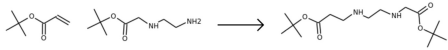 | 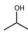                                                                                                      | —OH                                                                                 | —OH                                                                                 | 60.0 | 28.4 | 28.4 |

## Feature definition used in the Morgan fingerprints

Supplementary Table 8. Feature definition as defined by Gobbi et al. <sup>6</sup>

| Invariants                                 | SMARTS                                                                                                                                                                                       |
|--------------------------------------------|----------------------------------------------------------------------------------------------------------------------------------------------------------------------------------------------|
| Hydrogen bond donor                        | <chem>[[N;!H0;v3],[N;!H0;+1;v4],[O,S;H1;+0],[n;H1;+0]]</chem>                                                                                                                                |
| Hydrogen bond acceptor                     | <chem>[\$([O,S;H1;v2]-[!\$(*4[O,N,P,S]))],[O,S;H0;v2],[O,S;-],[N&amp;v3;H1,H2]-[!\$(*4[O,N,P,S]))],[N;v3;H0],[n,o,s;+0],F]</chem>                                                            |
| Basic group                                | <chem>[\$([N;H2&amp;+0][C,a];!\$([C,a](4O)))),\$([N;H1&amp;+0]([C,a];!\$([C,a](4O))))[C,a];!\$([C,a](4O))),\$([N;H0&amp;+0]([C;!\$(C(4O)))([C;!\$(C(4O))][C;!\$(C(4O))]),[N,n;X2;+0]]</chem> |
| Hydrophobic group                          | <chem>[\$([C;H2,H1](14*)[C;H2,H1][C;H2,H1][C;H1,H2,H3];!\$(C4*)),\$(C([C;H2,H3])([C;H2,H3])[C;H2,H3])]</chem>                                                                                |
| Acidic group                               | <chem>[O;H1]-[C,S](4[O,S,P])</chem>                                                                                                                                                          |
| Halogen                                    | <chem>[F,Cl,Br,I]</chem>                                                                                                                                                                     |
| Attachment point to aliphatic ring         | <chem>[\$([A;D3](@*)(@*)~*)]</chem>                                                                                                                                                          |
| Attachment point to aromatic ring          | <chem>[\$([a;D3](@*)(@*)*)]</chem>                                                                                                                                                           |
| Any unusual atom (not H,C,N,O,F,S,Cl,Br,I) | <chem>[!#1;!#6;!#7;!#8;!#9;!#16;!#17;!#35;!#53]</chem>                                                                                                                                       |

## Reference

- (1) Schneider, N.; Lowe, D. M.; Sayle, R. A.; Landrum, G. A. Development of a Novel Fingerprint for Chemical Reactions and Its Application to Large-Scale Reaction Classification and Similarity. *J. Chem. Inf. Model.* **2015**, *55* (1), 39–53.
- (2) Marcou, G.; Aires de Sousa, J.; Latino, D. A. R. S.; de Luca, A.; Horvath, D.; Rietsch, V.; Varnek, A. Expert System for Predicting Reaction Conditions: The Michael Reaction Case. *J. Chem. Inf. Model.* **2015**, *55* (2), 239–250.
- (3) Alihodzic Suleijam; Lazarevski Gorjana. 4" Amino Linked Macrolides Useful for the Treatment of Microbial Infections. WO2006120545, 2006.
- (4) Moe, O. A.; Warner, D. T. 1, 4 Addition Reactions. III. The Addition of Cyclic Imides to  $\alpha$ - $\beta$ -Unsaturated Aldehydes. A Synthesis of  $\beta$ -Alanine Hydrochloride. *J. Am. Chem. Soc.*

**1949**, *71* (4), 1251–1253.

- (5) Burkholder, Timothy P.; Maynard, George D.; Kudlacz, E. M. . Carboxy Substituted Acyclic Carboxamide Derivatives. 09/648,005, 1999.
- (6) Gobbi, A.; Poppinger, D. Genetic Optimization of Combinatorial Libraries. *Biotechnol. Bioeng.* **1998**, *61* (1), 47–54.
